# Supplementary material for: Mfn2 Affects Embryo Development via Mitochondrial Dysfunction and Apoptosis
Source: PubMed Central journal article supplement (PMC4433325; doi:10.1371/journal.pone.0125680), 2015-05-15
Supplement: pone.0125680.s002.pdf [file pone.0125680.s002.pdf]

## Client: Professor wenpei xiang

Manuscript: Mfn2 affects embryo development via mitochondrial dysfunction and apoptosis

Journal: PLOS ONE

## Formatting Summary and Additional Instructions

Prepared: November 17, 2014

### **Congratulations—you're one step closer to submission!**

This report summarizes the work that has been done to bring your manuscript into compliance with your targeted journal's formatting requirements, and it describes any further changes that you will need to make before submitting your manuscript to your specified journal. Please review this document and the marginal comments in your manuscript carefully. If you have any questions, please contact us at [support@aje.com](mailto:support@aje.com).

### **Citations and References**

Your citations and reference list were corrected for spelling, author lists, journal abbreviations, and format according to the journal's specified style.

### **Figures and Figure Legends**

Per the journal guidelines, each figure should be submitted as a separate file. If you would like assistance preparing figures, please contact [support@aje.com](mailto:support@aje.com) to use our Figure Formatting service.
